# Supplementary material for: Sec16 influences transitional ER sites by regulating rather than organizing COPII
Source: PubMed Central journal article supplement — Mol Biol Cell. 2013 Nov 1;24(21):3406–19. doi: 10.1091/mbc.E13-04-0185 (PMC3814151; doi:10.1091/mbc.e13-04-0185), 2013-11-01
Supplement: supp_E13-04-0185_CombinedSupMats.pdf [file supp_E13-04-0185_CombinedSupMats.pdf]

# Supplemental Materials

*Molecular Biology of the Cell*

Bharucha et al.

P. pastoris --SSVFSEGESADFAELLKQEMTQTLDKPESVQNDRISNAQESTRLPENSTFE-NKFSFLEDDDEILEADD  
 K. lactis -PVNDAIEKATGDEDTDLNFSE--G-DDGAKEGLSWLNDQSNTEIPSPSEEA TKFSFLENDDDLDDDE  
 C. tropicalis -PVEKSVEQLNPEIPSKEQPKS--NLFADDKVDFFSELKPVTPPQEQEPDPLD-KLASLDLDDDLLLDEE  
 P. stipitis ---AGFFTERRPEQES**ETKQES**-LDELFEKDEDFLPELKPQVEQSTQTSKPKEFNLPFLDLDLDDDLLLDDDD  
 D. hansenii DHFDDL**FQNDHDFLQ**EVGSSD----**NKSD**PFKFPD**NSAPENKSD**KFETQNKSLDFLE**MD**DDDLLDDEF  
 P. guilliermondii ---DEL**FAGDDDFLQ**EIVKDQEPVTSNGNQDTKTP**SSQEP**EP**AEESQV**KKKD-S**F**AFLELDDDLLLDDDD  
 S. cerevisiae -VTSKSQ**EKHEDLFAASGNDEK**---**LPWEVSDGEVSSGKTENSMQTSTEKIAEQKFSFLENDDDLDDDD**

P. pastoris VQPYQPQQYTHSITSE**PVYRQYGDSV**G**QMA**APYSEYGGGTTYRQNPQPQRDQSRLDYNLSADVSTQTVI  
 K. lactis -**SLLDSDE**--E**VI**V**PQ**P**QTAQ**AP**KKSYLPS**ASSPV**QSVKHSYHPQSNP**YSPQASSFSNSVSGQPPSFPQ  
 C. tropicalis -**FLDEEFL**--NE**PVSEL**P**LQ**L**QVP**L**QVP**Q**QNL**Q**PQ**P**QVE**PRM-----  
 P. stipitis -**LLDDDEP**---EL**VPEP**-**VAP**VE**PIQ**E**AIQ**NN**VAKS**-----  
 D. hansenii -**LEDD**-----**TTSQT**TL**KS**-----  
 P. guilliermondii -**LLPDEED**-----**EGEINS**NA**TVVQ**P**QTT**TSR-----  
 S. cerevisiae **SFLASSEEE**EDTV**PNTDNT**NT**LSKPV**EE**KKASRYKPI**IEEE**EAGMRQE**VHFTNTTGIVTP**QQFH**-----

P. pastoris RRP**IRKS**MP**SDRY**NP**GGNNHAGL**ST**PV**PD**RTMI**Y**PNILSPA**Q**E**FAG**HPK**LD**ALEQ**AK**KK**T**DAY**DF**PP**DM**L**  
 K. lactis NPSS**Y**TY**P**V**AST**-----V**PA**S**VAP**G**IVK**PK**LINNS**NS**SQ**SS**VSDVNEL**H**KKL**D**EAK**H**RT**DAY**DF**PL**DLV**  
 C. tropicalis -----R**KKSY**V**PV**GM**KSP**I**YTP**PS**ASAK**LA**QSN**DF**VKNLE**Q**S**KK**KKH**DAY**DF**PE**DELM**  
 P. stipitis -----P**RQ**TY**I**PT**QPH**HM**YAP**Q**IS**RT**DTGE**Y**V**KK**LEEN**KK**R**ND**AY**DF**PD**I**LM**  
 D. hansenii -----N**KQ**TY**L**PS**T**NP**ST**TP**VV**PT**QEK**-----P**KGS**AM**N**KK**K**ND**AY**DF**PD**S**LI**  
 P. guilliermondii -----Y**SR**PL**Q**PT**ST**SS**SF**SK**P**V**AAQ**E**F**-----N**KK**LE**E**AK**KK**H**DAY**DF**PP**S**NLL**  
 S. cerevisiae -----G**L**TK**T**GL**G**T**PN**Q**V**SV**PNIV**SP**K**PP**V**K**D**NR**S**N**F**K**INE**E**KKK**S**DAY**DF**PL**E**II**

P. pastoris **K**TR**LQ**P**SN**KN**LQ**TV**SQ**NY**TSAG**Y**P**PL**RA**-----**AS**IS**TV**GT**DIS**F**NN**IDA**Q**PP**KR**-----  
 K. lactis **KQ**E**I**K**R**G**K**P-----M**H**IT**S**P-L**P**S**IR**Q-----**PS**F**SS**V**ASE**K**PL**-----**I**Q**PP**V**R**-----**P**Q**P**NN  
 C. tropicalis V**NT**TR**PS**L**RH**MA**ST**SS**AS**V**RY**G**PP**SG**HQ**SA-----**SS**IS**PS**G**L**APP-SAN**V**SG**EL**K**TIS**S**AP**H**AP**ST  
 P. stipitis P**PK**V**K**P**AP**R**H**H**Q**PT**TK**Y**SQ**P**V**AS**PN**L**SNI**-----**PS**APP**ATT**IP**PP**V**S**IG**E**ASK**KEL**PT**TP**Q**V**AP**G**  
 D. hansenii A**H**K**F**PA**AR**ST**N**K**Y**AP**G**SS**NH**NS**P**V**ASM**--P**PK**L**H**PS**M**NA**V**G**S**V**P**V**P**---NE**K**Q**AT**MS**Q**PL**S**AA**V**ST  
 P. guilliermondii H**L**S**I**K**P**AP**R**T**N**K**Y**AA**P**SG**S**AG**S**PN**S**AS**AS**APP**PL**TT**S**L**PL**HP**Q**AA**P**G**V**A**Q**EN**R**PP**L**Q**S**H**S**AP**N**Q**AP**S  
 S. cerevisiae SESS**K**KG**H**AK**P**V**AV**PT**Q**R**F**GS**NS**F**S**SL**DK**PI**P**Q**S**R**K**G**S**NN**S**NR**PP**VI**PL**GT**Q**EP**R**SS**R**T**NS**A**IS**S**Q**SP**VN**

P. pastoris AV**KKK**Q**S**F**Y**SE**L**P**IN**N**L**--TR**N**K**P**--SV**H**AK**D**P**Y**AE**IES**I**AY**H**N**R**S**R**S**ST**V**R**ST**N**I**N**H**V**P**P-----  
 K. lactis TK**AP**Q**K**P**F**Y**A**EL**P**IP**E**L**K**P**T**RA**AP**IR**IAS**Q**NS**F**S**--G**SS**AL**PS**Q**P**IA**A**Q**S**R**R**T**S**ID-----  
 C. tropicalis EN**AP**KK**S**F**F**VE**F**PD**E**D**IP**KA--RR**P**V**RA**AP**V**K**AV**N--**Q**I**H**SP**K**V**L**N**Q**Q**L**Q**Q**V**PP**S**V**PP**K**TT**K**T-----  
 P. stipitis **K**---P**K**S**F**FE**L**P**V**S**M**P**K**KA--ARA**AP**V**K**AV**N**Q**PH**-I**Q**K**S**--**P**Q**I**S**N**T**P**IS**ASS**K**P**-----  
 D. hansenii Q**G**L**Q**KK**S**F**F**ED**L**P**IP**V**Q**K**Q**P-V**K**PAR**A**-AL**P**---R**S**Q**M**S**Q**S**I**S**P**T**V**NP**A**Q**P**Q**L**Q**K**-----  
 P. guilliermondii **K**SP**AK**KS**F**FE**L**PI**P**T**P**RA**A**--VR**P**ARS--G**P**SK**P**-----**S**P**V**T**A**K**P**AV**G**Q**A**Q**K**K**P**T**Q**-----  
 S. cerevisiae YA**F**PN**P**Y**K**I**Q**Q**L**Q**Q**AP**I**Q**S**GM**PL**PN**T**N**I**PP**P**AL**K**V**E**TT**V**S**AP**PI**R**AR**G**V**S**NA**S**V**G**SS**A**S**F**GAR**H**AT**Q**Y**GL**

P. pastoris ----**PP**V**N**P**Y**AP**V**N**K**A**L**Q**T**P**DL**N**P**Q**T**V**P**PP**P**-----**NN**M**F**APP**PA**IT**Q**HT**G**Y**AS**P**S**TH**T**Q**N**Q  
 K. lactis ----**PP**V**N**P**Y**AP**K**KN**V**AV**V**N**P**T**I**AP**NS**V**AY**G**IN**N**V**PS**K**G**Q**N**L**Q**AN**IL**S**APP**R**NT**I**V**SP**VT**I**A**H**N**P**Y**T**PS  
 C. tropicalis ----**PP**V**N**P**Y**K**P**K**S**G**T**---**SP**IL**Q**-Q**H**V**P**I**I**H**Q**SG**I**A**APP**S**A**I**G**S**S**T**Y**APP**Q**Q**PP**V-AG**S**APP**PP**PP**AAA**  
 P. stipitis ----**AP**V**N**P**Y**M**P**S**N**T**Q**K**Q**N**PH**S**PL**Q**G**S**Q**S**F**PR**K**T**S**SG**L**APP**PAL**N**Q**Y**APP**SS**N**Q----**Y**AT**V**S--**A**Q**V**Q  
 D. hansenii ----**P**V**V**N**P**Y**A**K**P**AM**N**T**V**V**S**PP**M**N**Y**A**Q**PP**G**M**P**Q**V**T**N**NR**G**GS**H**L**P**AG**M**V**APP**PP**S**Q**I**T**G**NN**V**L**P**-**H**A**Q**P**Q**  
 P. guilliermondii ----**PP**V**N**P**Y**AM**Q**N-----**L**K**T**PS**AA**SS**P**AS**AV**P**Q**VT**L**PN**AP**V**G**---**P**V**PP**V**AP**I**G**G**V**V**AP**G**P**F**S**DM**AS**V  
 S. cerevisiae N**NG**V**PP**V**S**P**Y**Q**AT**-----**I**N**L**P**T**ANK-----**Y**AP**V**SP**T**V**Q**Q**K**Q**Y**PS**V**V**Q**N**L**G**S**

Figure S1

**Figure S1.** Alignment of UCR sequences from various yeasts. The UCR of *P. pastoris* Sec16 (residues 500 – 868) was aligned with corresponding Sec16 sequences from the following yeasts: *Kluyveromyces lactis* (residues 313 – 673), *Candida tropicalis* (residues 403 – 744), *Pichia stipitis* (residues 479 – 793), *Debaromyces hansenii* (residues 467 – 771), *Pichia guilliermondii* (residues 307 – 620), and *S. cerevisiae* (residues 457 – 824). An initial ClustalW alignment was edited extensively by hand to highlight similarities identified by BLAST searches. Residues highlighted in yellow match the consensus.

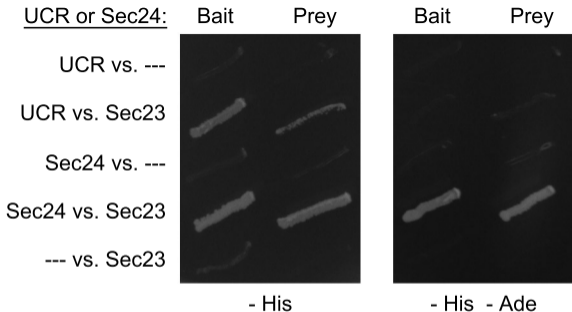

Figure S2

**Figure S2.** Two-hybrid interaction of the UCR with Sec23 using *S. cerevisiae* proteins. In the yeast streaks on the left side of each plate, a “prey” vector encoding *S. cerevisiae* Sec23 was tested against “bait” vectors encoding *S. cerevisiae* versions of either the UCR (residues 457-977) or Sec24. Empty vectors (“---”) were used as controls. In the yeast streaks on the right side of each plate, the “bait” and “prey” vector backbones were swapped. A weak interaction is sufficient for growth on the plate lacking histidine (“– His”), whereas a strong interaction is needed for growth on the plate lacking both histidine and adenine (“– His – Ade”).

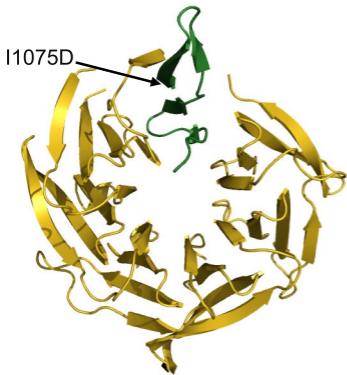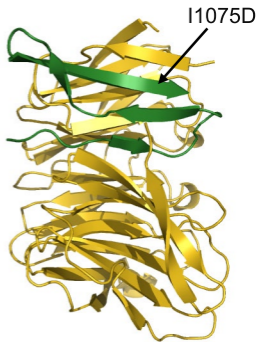

Figure S3A

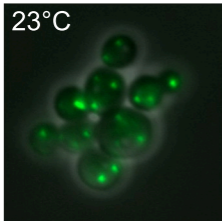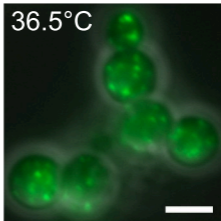

Figure S3B

**Figure S3.** tER dispersal caused by an I1075D mutation in the Sec13-binding blade of the CCD. (A) Crystal structure of a chimera between *P. pastoris* Sec13 and the  $\beta$ -stranded blade of the CCD from *P. pastoris* Sec16 (CCD $\beta$ ). Shown on the left is a view from the top of the Sec13  $\beta$ -propeller bound to CCD $\beta$ , with the N-terminal portion of CCD $\beta$  projecting into the foreground. A side view is shown on the right. Visible in the crystal structure are amino acids 1042-1076 of Sec16, colored in green, and 13-299 of Sec13, colored in yellow. The position of the I1075D mutation is indicated. (B) tER dispersal in a *sec16-I1075D* mutant at 36.5°C. This mutant allele was introduced by gene replacement into a strain expressing Sec13-GFP, and cells were imaged under the conditions described in Figure 4C. Scale bar, 5  $\mu$ m.



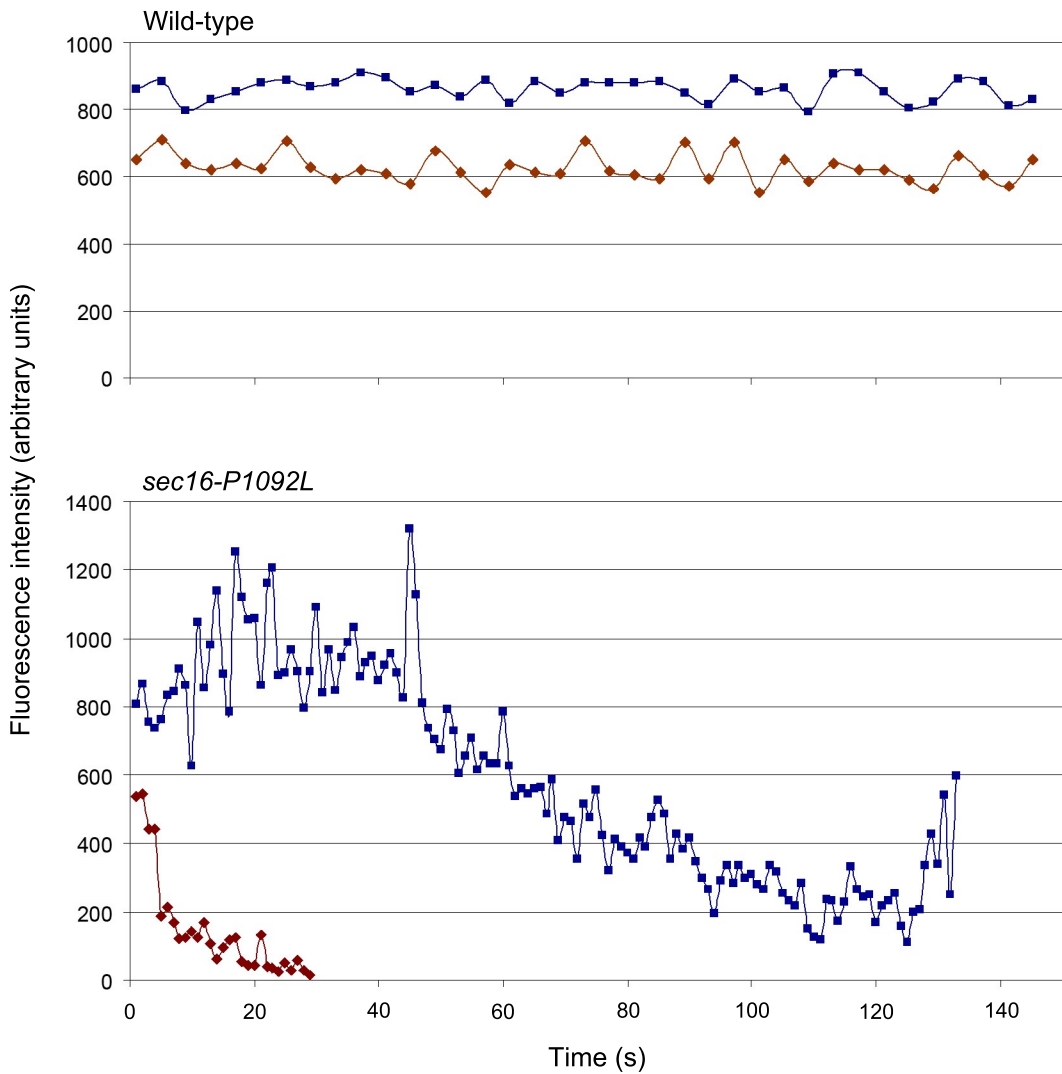

Figure S4A

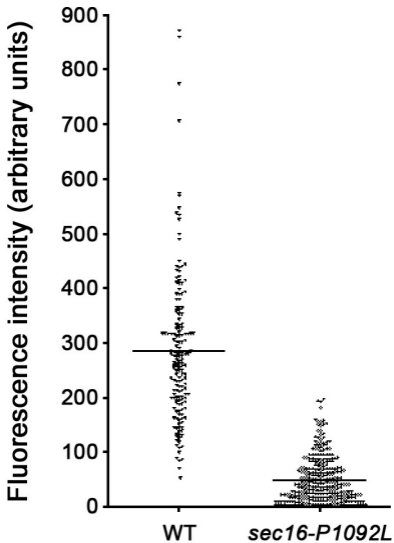

Figure S4B

**Figure S4.** Accelerated shrinkage and reduced fluorescence intensity of tER sites in the *sec16-P1092L* mutant. (A) Rapid shrinkage of tER sites after fusion events in *sec16-P1092L* cells. Two representative fused tER sites were analyzed by 4D microscopy at 36.5°C after fusion events in wild-type cells (top panel) or *sec16-P1092L* mutant cells (bottom panel). Fluorescence intensity is plotted as a function of time. In wild-type cells, a fused tER site typically requires tens of minutes to shrink to the steady-state size (Bevis *et al.*, 2002). (B) Quantitation of tER site fluorescence intensities in wild-type and *sec16-P1092L* cells at 36.5°C. 4D movie projections were examined, and fluorescence signals were measured for all resolvable tER sites. A total of 172 wild-type tER sites and 322 *sec16-P1092L* tER sites were analyzed. Each dot represents an individual tER site, and the horizontal line represents the average of the values obtained.

**A. Sec23-GFP**  
Sar1(T34N) before temperature shift

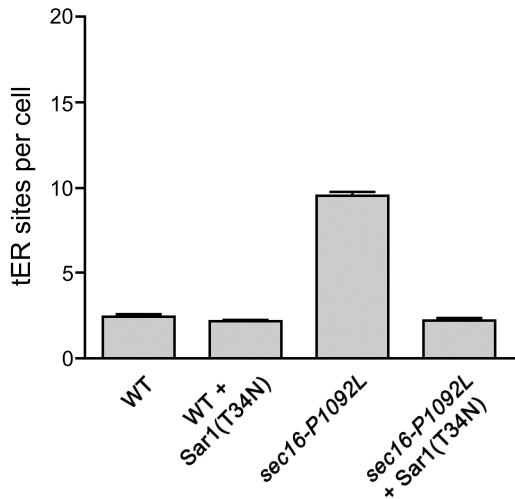

**B. Sec13-GFP**  
Sar1(T34N) after temperature shift

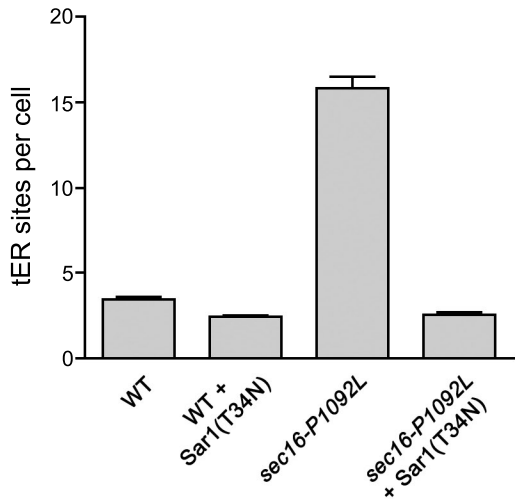

**Figure S5**

**Figure S5.** Prevention or reversal of tER dispersal by expression of Sar1(T34N). Where indicated, a shift to methanol-containing medium induced expression of Sar1(T34N). (A) The procedure was the same as in Figure 6D-E, except that tER sites were labeled with Sec23-GFP. (B) The procedure was the same as in Figure 6D-E, except that the cells were first grown for 1 h at 36.5°C to cause tER dispersal, and then shifted to methanol medium for 2.5 h at 36.5°C.

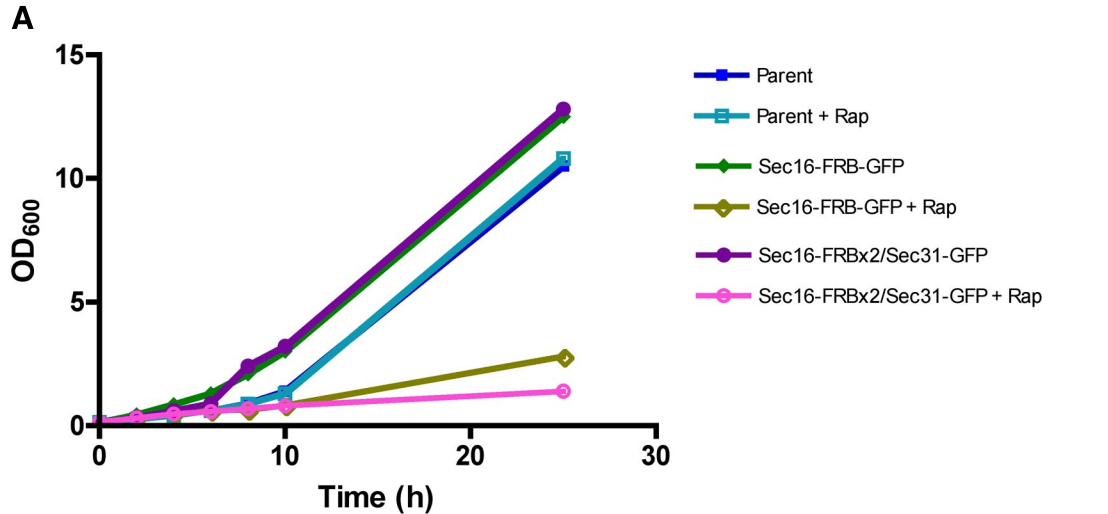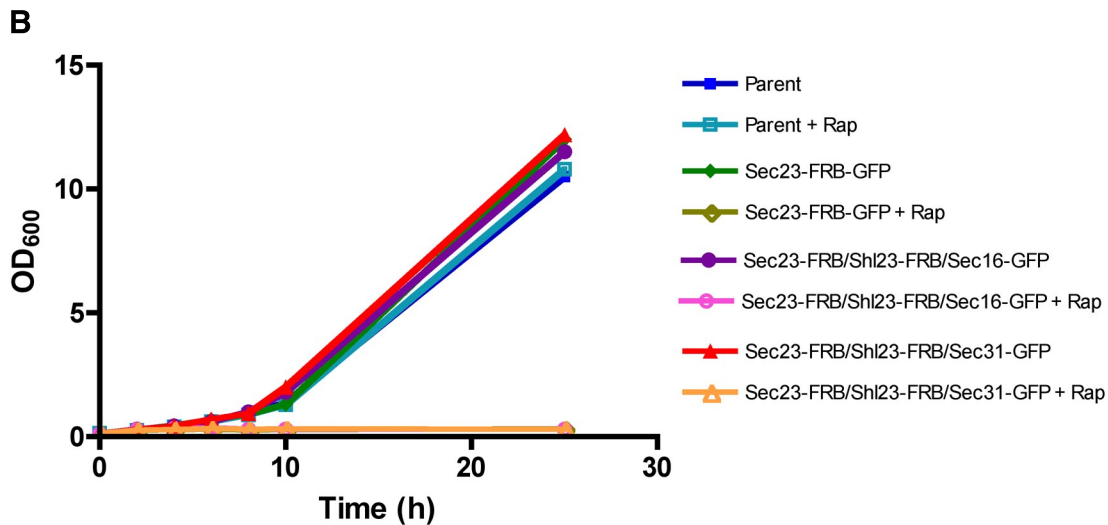

Figure S6

**Figure S6.** Growth inhibition by rapamycin in anchor-away strains. (A) The Sec16 anchor-away strains used in Figure 7, plus the parental rapamycin-resistant Rpl17-FKBPx4 strain (“Parent”), were grown in YPD at 30°C to an OD<sub>600</sub> of 0.1. Then 1 µg/mL rapamycin (“Rap”) was added to half of each culture, and the cultures were incubated for an additional 25 h. At the indicated time points, OD<sub>600</sub> was measured. (B) Same as (A), except that the analysis was performed with the Sec23 anchor-away strains used in Figure 8.

**Movie S1.** tER dynamics in wild-type cells. tER sites in wild-type *P. pastoris* cells were labeled with Sec13-GFP, and cells were imaged by 4D confocal microscopy at intervals of 4 sec between each Z-stack. The fluorescence data for each time point were projected and merged with a DIC image of the cells. Time is indicated in min:sec format.

**Movie S2.** tER dynamics in *sec16-P1092L* mutant cells. Imaging and image processing were performed as for Movie S1, except that the cells carried the *sec16-P1092L* allele and the intervals between Z-stacks were 2 sec.



**Table S1.** X-ray data collection and refinement statistics for CCD $\beta$ -Sec13.

---

| <b>Data collection</b>                      |                     |
|---------------------------------------------|---------------------|
| Space group                                 | $P2_1$              |
| Cell dimensions                             |                     |
| $a, b, c$ (Å)                               | 70.51, 49.32, 90.90 |
| $\alpha, \beta, \gamma$ (°)                 | 90.0, 111.7, 90.0   |
| Wavelength (Å)                              | 1.1                 |
| Resolution (Å)                              | 50-1.55             |
|                                             | (1.61-1.55)         |
| $R_{\text{sym}}$ (%) <sup>a</sup>           | 8.5 (68.0)          |
| $\langle I / \sigma_I \rangle$ <sup>a</sup> | 12.9 (1.9)          |
| Completeness (%) <sup>a</sup>               | 99.3 (93.2)         |
| Redundancy <sup>a</sup>                     | 6.9 (5.6)           |
| <b>Refinement</b>                           |                     |
| Resolution (Å)                              | 44-1.6              |
| No. reflections                             | 76777               |
| $R_{\text{work}} / R_{\text{free}}$         | 0.180 / 0.212       |
| No. atoms                                   |                     |
| Protein (non-H)                             | 5033                |
| Riding hydrogens                            | 4899                |
| Waters                                      | 306                 |
| Ca <sup>2+</sup> , Cl <sup>-</sup> , EDO    | 25                  |
| B-factors (Å <sup>2</sup> ) <sup>b</sup>    |                     |
| Main-chain                                  | 21.4                |
| Side-chain                                  | 28.9                |
| Non-protein                                 | 30.5                |
| R.m.s. deviations <sup>c</sup>              |                     |
| Bond lengths (Å)                            | 0.013               |
| Bond angles (°)                             | 1.49                |
| B-factors (m/c) (Å <sup>2</sup> )           | 3.8                 |
| B-factors (s/c) (Å <sup>2</sup> )           | 5.3                 |
| Ramachandran                                |                     |
| Within favored (%)                          | 96.6                |
| Within allowed (%)                          | 99.7                |
| Outliers (%)                                | 0.3                 |

---

a: Values in parentheses are for the highest resolution shell.

b:  $R_{\text{sym}} = \frac{\sum_h \sum_i |I_{h,i} - I_h|}{\sum_h \sum_i I_{h,i}}$ , where  $I_h$  is the mean intensity of the  $i$  observations of symmetry related reflections of  $h$ .  $R = \frac{\sum |F_{\text{obs}} - F_{\text{calc}}|}{\sum F_{\text{obs}}}$ , where  $F_{\text{obs}} = F_P$ , and  $F_{\text{calc}}$  is the calculated protein structure factor from the atomic model ( $R_{\text{free}}$  was calculated with 5% of the reflections).

c: The r.m.s.d. values in bond lengths and angles are the deviations from ideal values, and the r.m.s.d. in B factors is calculated between bonded atoms.
